# Supplementary material for: Measuring Satisfaction and Comfort with Gender Identity and Gender Expression among Transgender Women: Development and Validation of the Psychological Gender Affirmation Scale
Source: MDPI journal article supplement (doi:10.3390/ijerph18063298), 2021-03-23
Supplement: s1 [file s1]

Supplementary Figure 1: Flowchart of participant inclusion

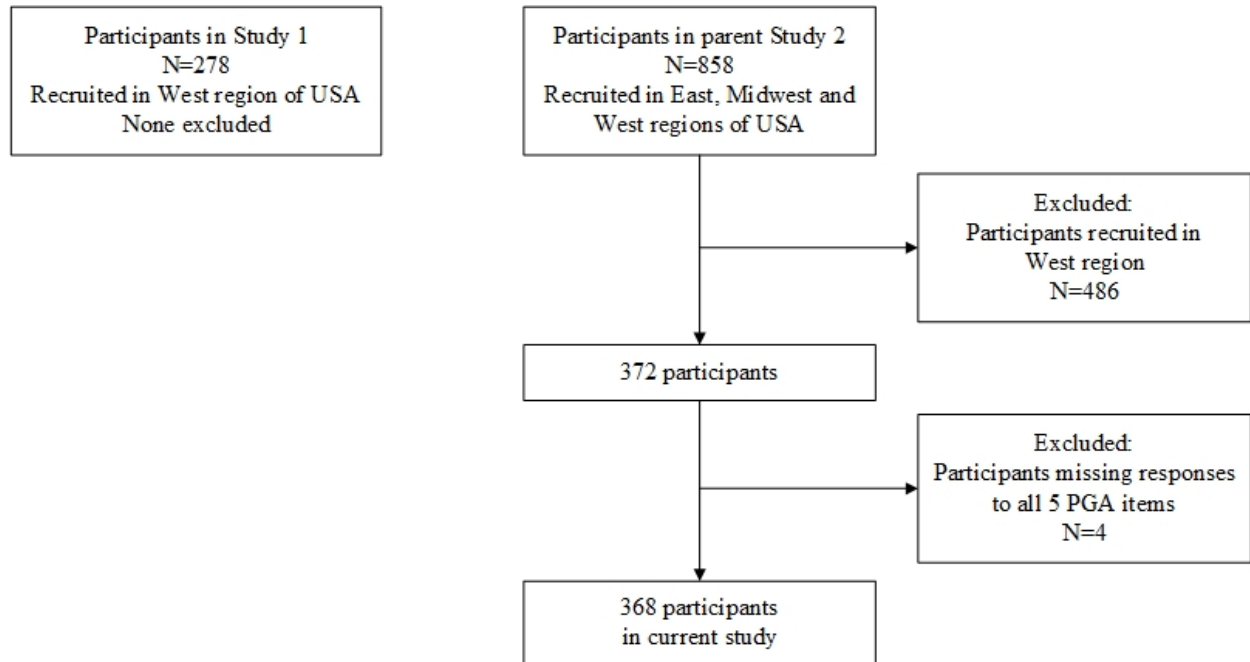

Supplementary Table 1: Descriptive characteristics of participants in Study 1 and Study 2 by geographic region of United States of America

| Characteristic                          | Study 1         | Study 2         |                    |
|-----------------------------------------|-----------------|-----------------|--------------------|
|                                         | West<br>(N=278) | East<br>(N=167) | Midwest<br>(N=201) |
| Age in years - mean (std. dev)          | 43.5 (10.7)     | 36.1 (10.8)     | 32.6 (10.6)        |
|                                         | n (%)           | n (%)           | n (%)              |
| Race-Ethnicity                          |                 |                 |                    |
| Hispanic, Latina, or of Spanish origin  | 91 (32.7)       | 141 (84.4)      | 23 (11.4)          |
| Black, non-Hispanic                     | 126 (45.3)      | 16 (9.6)        | 171 (85.1)         |
| White, non-Hispanic                     | 19 (6.8)        | - -             | - -                |
| Asian or Pacific Islander, non-Hispanic | 8 (2.9)         | 0 (0)           | 1 (0.5)            |
| Additional, non-Hispanic                | 3 (1.1)         | 1 (0.6)         | 0 (0)              |
| Multiracial, non-Hispanic               | 30 (10.8)       | 1 (0.6)         | 4 (2.0)            |
| No response                             | 1 (0.4)         | 8 (4.8)         | 2 (1.0)            |
| Education                               |                 |                 |                    |
| Less than grade 12                      | 78 (28.1)       | 76 (45.5)       | 45 (22.4)          |
| Grade 12                                | 109 (39.2)      | 44 (26.4)       | 99 (49.3)          |

|                                                     |            |           |            |
|-----------------------------------------------------|------------|-----------|------------|
| Some college or higher                              | 91 (32.8)  | 33 (19.8) | 54 (26.9)  |
| No response                                         | 0 (0)      | 14 (8.4)  | 3 (1.5)    |
| Financially secure <sup>1</sup>                     | 49 (17.6)  | 38 (22.8) | 50 (24.9)  |
| Experienced homelessness in previous 6 months       | 114 (41.0) | 67 (40.1) | 96 (47.8)  |
| Sex work as a source of income in previous 6 months | 50 (18.0)  | 44 (26.4) | 90 (44.8)  |
| Currently taking hormones                           | 187 (67.3) | 69 (41.3) | 104 (51.7) |

<sup>1</sup> Study 1: ‘Currently’, Study 2: ‘in the previous 6 months’
